# Supplementary material for: Characterisation of peripheral blood mononuclear cell microRNA in hepatitis B-related acute-on-chronic liver failure
Source: PubMed Central journal article supplement (PMC4533317; doi:10.1038/srep13098), 2015-08-12
Supplement: srep13098-s1.pdf [file srep13098-s1.pdf]

**Characterisation of peripheral blood mononuclear cell microRNA in hepatitis  
B-related acute-on-chronic liver failure**

Wenchao Ding<sup>1,2</sup>, Jiaojiao Xin<sup>1</sup>, Longyan Jiang<sup>1</sup>, Qian Zhou<sup>1</sup>, Tianzhou Wu<sup>1</sup>,  
Dongyan Shi<sup>1</sup>, Biaoyang Lin<sup>1,2</sup>, Lanjuan Li<sup>1</sup>, Jun Li<sup>1\*</sup>

**Contents**

Supplemental Table 1.

Supplemental Table 2.

*Supplemental Table 1. Summary of miRNAs in each sample*

| Sample     | Known miRNA number | Read count of miRNAs | Percentage of hsa-miR-21-5p (%) | Second abundant miRNA | Percentage (%) |
|------------|--------------------|----------------------|---------------------------------|-----------------------|----------------|
| HBV-ACLF-1 | 721                | 12,397,041           | 73.1                            | hsa-miR-148b-3p       | 2.1            |
| HBV-ACLF-2 | 715                | 8,441,948            | 63.2                            | hsa-miR-30e-5p        | 2.3            |
| HBV-ACLF-3 | 813                | 7,035,618            | 46.9                            | hsa-let-7g-5p         | 5.0            |
| HBV-ACLF-4 | 659                | 6,448,816            | 66.1                            | hsa-miR-30e-5p        | 2.5            |
| CHB-1      | 793                | 4,775,333            | 24.4                            | hsa-miR-451a          | 5.9            |
| CHB-2      | 808                | 7,487,423            | 26.5                            | hsa-miR-26a-5p        | 7.5            |
| CHB-3      | 684                | 4,374,219            | 21.1                            | hsa-let-7g-5p         | 11.1           |
| CHB-4      | 754                | 5,679,992            | 24.6                            | hsa-let-7g-5p         | 7.1            |
| CTL-1      | 779                | 6,381,043            | 22.8                            | hsa-miR-26a-5p        | 7.7            |
| CTL-2      | 757                | 6,668,115            | 30.6                            | hsa-let-7g-5p         | 7.6            |
| CTL-3      | 756                | 5,356,852            | 17.8                            | hsa-miR-26a-5p        | 7.0            |
| CTL-4      | 786                | 8,090,160            | 34.2                            | hsa-miR-26a-5p        | 6.2            |

*Supplemental Table 2. Novel miRNA candidates predicted by miRDeep2.*

| Name     | Read count | Mature sequence         | Precursor coordinate                |
|----------|------------|-------------------------|-------------------------------------|
| L-miR-1  | 1131       | uccacauguaaaaaaagaauuc  | chr1:63966763..63966827:-           |
| L-miR-2  | 1125       | ucugccaacccuuguccag     | chr11:68946743..68946826:-          |
| L-miR-3  | 705        | ugaggccgagaaggcaaccgcga | chr1:150207085..150207139:+         |
| L-miR-4  | 249        | ucugccaacccuuguacca     | chr8:53115934..53115999:+           |
| L-miR-5  | 156        | uagagcugaaauacuuccaga   | chr1:167440520..167440586:-         |
| L-miR-6  | 148        | uuugacuugaacuauccccagg  | chr5:176932110..176932198:-         |
| L-miR-7  | 96         | ugggcucucucuggccaca     | chr2:85109656..85109712:+           |
| L-miR-8  | 90         | uuauccuccaguagacuaggga  | chr8:99405894..99405953:-           |
| L-miR-9  | 89         | gaccucgccgucgccgccgc    | chrUn_gl000220:150005..150061:<br>+ |
| L-miR-10 | 84         | uuggggcuguucucucuccacu  | chr1:112783906..112783968:-         |
| L-miR-11 | 75         | uuaguggcuccucugccugca   | chr19:57950479..57950542:+          |
| L-miR-12 | 74         | aaccccagacugggaggaccu   | chr9:135878152..135878209:-         |
| L-miR-13 | 66         | ugcccggauuauacuauuag    | chr3:143136938..143136992:-         |
| L-miR-14 | 60         | agcaccugccgagcacugaga   | chr17:75675458..75675512:+          |
| L-miR-15 | 57         | caacaggccuugcugcucacaga | chr3:52557372..52557444:+           |
| L-miR-16 | 54         | accucaguccguauuggucucu  | chr17:7210149..7210207:-            |
| L-miR-17 | 45         | uauguccuaguggcugcugucu  | chr13:27259471..27259537:+          |
| L-miR-18 | 45         | aauccucacuuugaauccaugu  | chr2:16612738..16612800:-           |
| L-miR-19 | 39         | uaucugcuguuguccucagg    | chr19:7533657..7533712:+            |
| L-miR-20 | 39         | ugacuacuuuguuaguuuuugu  | chr6:142308571..142308637:-         |
| L-miR-21 | 37         | uggcuggcugcuccggcacu    | chr10:43966686..43966748:+          |
| L-miR-22 | 36         | acuccuauuuuuaaacucagg   | chrX:128924417..128924477:+         |
| L-miR-23 | 33         | aagaguuaacuagaacuauuca  | chr12:21671603..21671661:+          |
| L-miR-24 | 33         | uaggccauuuuggaagcuguuu  | chr2:33498399..33498463:+           |
| L-miR-25 | 32         | ggcuccaccuuccuagguuggc  | chr22:26968292..26968349:-          |
| L-miR-26 | 30         | agcucccagucuggccugagu   | chr1:55784365..55784418:+           |
| L-miR-27 | 30         | caguucaauugguguucagcaga | chr2:74766442..74766500:-           |

|          |    |                           |                              |
|----------|----|---------------------------|------------------------------|
| L-miR-28 | 30 | ccuucucgagccuugaguguc     | chr3:52427970..52428031:+    |
| L-miR-29 | 30 | uaggacguaugcuuaccuguc     | chr7:139422461..139422510:-  |
| L-miR-30 | 29 | agauggggagaacucaauccu     | chr4:48222138..48222200:-    |
| L-miR-31 | 28 | agcauaaacugcaugccugcac    | chr4:76895032..76895095:-    |
| L-miR-32 | 27 | aaugauggcaucaaacaggugc    | chr19:16477970..16478030:+   |
| L-miR-33 | 27 | cucacccuguggcacucugggc    | chr22:50757156..50757234:+   |
| L-miR-34 | 27 | auuauucacuuauuacucaac     | chr7:18434903..18434962:+    |
| L-miR-35 | 26 | uagacaaucuguguagaguc      | chr11:18026255..18026317:-   |
| L-miR-36 | 26 | auuccuuuuucucuuccucaga    | chr11:122928626..122928692:- |
| L-miR-37 | 25 | uuuuuuucaaggacagcugga     | chr2:230195438..230195491:-  |
| L-miR-38 | 25 | aggcgggaauuccaucuauug     | chr22:40706263..40706326:+   |
| L-miR-39 | 24 | ccuguucgaaauguuagugga     | chr1:193126397..193126457:+  |
| L-miR-40 | 24 | acaugugucugugucgccagc     | chr16:3598217..3598270:-     |
| L-miR-41 | 24 | gcagccgggaaagaacuguc      | chr3:194304530..194304584:-  |
| L-miR-42 | 23 | agcccaaagcacuuggcugcccugc | chr16:29816043..29816107:+   |
| L-miR-43 | 23 | uuacaaaugauuacuguuuacu    | chr6:836156..836216:+        |
| L-miR-44 | 22 | uugaacuugggacuaagccugu    | chr2:172265618..172265688:-  |
| L-miR-45 | 21 | aaugaacugcucuaugcuacu     | chr5:142306557..142306627:+  |
| L-miR-46 | 20 | augugaaauggaauuagaa       | chr2:172605840..172605902:+  |
| L-miR-47 | 20 | ugaacuugacuuacaggugaa     | chr5:94251400..94251463:-    |
| L-miR-48 | 20 | aauuuuagggauaacag         | chrX:3450117..3450177:-      |
| L-miR-49 | 19 | agaaucuguugguaagccucu     | chr1:221987294..221987355:-  |
| L-miR-50 | 19 | gucccagacucuccgggcugu     | chr2:17934536..17934597:-    |
| L-miR-51 | 19 | uuuuuugcuggaacuuucuggu    | chr6:39042089..39042159:+    |
| L-miR-52 | 19 | uaaacacuggccaccagcagu     | chr9:95798465..95798518:+    |
| L-miR-53 | 19 | uggaaaauuccuggaagucu      | chr9:28832561..28832614:-    |
| L-miR-54 | 18 | ugcgugaguccgggcuccagu     | chr15:63779648..63779720:-   |
| L-miR-55 | 18 | gaagcagcgcucugcgaacucg    | chr17:76136837..76136896:+   |
| L-miR-56 | 18 | caaugagaaccagauaucug      | chr20:12440539..12440606:+   |

|          |    |                          |                              |
|----------|----|--------------------------|------------------------------|
| L-miR-57 | 18 | uucuuggaccuugcuucagacc   | chr5:171560962..171561020:-  |
| L-miR-58 | 17 | aaaugaaucauguuggccugu    | chr10:115051389..115051439:- |
| L-miR-59 | 17 | ugccuugcccucuccucuagg    | chr3:48717661..48717717:-    |
| L-miR-60 | 16 | uugccucuccguccuguagu     | chr19:3201463..3201522:+     |
| L-miR-61 | 16 | aaacucugagcaagaacuccu    | chr21:36824270..36824337:+   |
| L-miR-62 | 16 | uauacugaacagugcaccga     | chr22:47167319..47167372:+   |
| L-miR-63 | 16 | ucuucaggaacucuggcuaacu   | chr9:37804227..37804283:+    |
| L-miR-64 | 15 | uuugccuuuuuuguucuuga     | chr1:215761740..215761807:+  |
| L-miR-65 | 15 | caacguacuaagaauaaauuuc   | chr12:29416584..29416644:+   |
| L-miR-66 | 15 | ugagcuagggauaucuccugaga  | chr4:39240137..39240200:+    |
| L-miR-67 | 15 | ugauuguuuuggaauaaauga    | chr9:98645113..98645170:+    |
| L-miR-68 | 15 | uacauugaauuugggauuacu    | chrY:15405891..15405953:-    |
| L-miR-69 | 14 | aaacuuauagaaaagugacuguuu | chr10:4926783..4926851:+     |
| L-miR-70 | 14 | aagagcucucuggcuuugccu    | chr10:103986836..103986892:+ |
| L-miR-71 | 14 | uauuacguuauacaguauuacu   | chr9:117692175..117692239:+  |
| L-miR-72 | 13 | uuaguucuguggcaacaucgau   | chr1:178712691..178712748:+  |
| L-miR-73 | 13 | caaacaggccuagcacaguga    | chr11:92933053..92933118:+   |
| L-miR-74 | 13 | uauauauguuguguauuacg     | chr11:44254690..44254755:+   |
| L-miR-75 | 13 | ccuuccccaccucuccugcagc   | chr19:13063444..13063504:+   |
| L-miR-76 | 13 | ucaccucuaaaucuccucaga    | chr19:35500733..35500793:+   |
| L-miR-77 | 12 | ucuguccugggacguuggugucc  | chr20:47337764..47337827:-   |
| L-miR-78 | 12 | uuugcagaauugguugcuugcu   | chr4:15719466..15719522:+    |
| L-miR-79 | 12 | uaggagaacauaagggaucuu    | chr6:24819039..24819096:+    |
| L-miR-80 | 12 | uaggagaacauaagggaucuu    | chr6:24819036..24819093:-    |
| L-miR-81 | 11 | ucuggcuccuuucuaaucacu    | chr12:81300351..81300410:-   |
| L-miR-82 | 11 | uuccccccaaaaucuaauuguu   | chr13:35537587..35537649:+   |
| L-miR-83 | 11 | uauauauaaaugccuguaaga    | chr15:65553703..65553763:-   |
| L-miR-84 | 10 | acacucaucaacugugccugac   | chr1:147829303..147829365:+  |
| L-miR-85 | 10 | acacucaucaacugugccugac   | chr1:147803763..147803824:-  |

|           |    |                         |                             |
|-----------|----|-------------------------|-----------------------------|
| L-miR-86  | 10 | aaacaacuuguuucucuugcuu  | chr12:62609452..62609507:+  |
| L-miR-87  | 9  | ugugggcgacaagguugcugc   | chr22:24833922..24833985:+  |
| L-miR-88  | 9  | agcauaaacugcaugccugcac  | chr4:76895073..76895126:-   |
| L-miR-89  | 8  | uuaauauguacugacaaagcgu  | chr10:5729070..5729133:+    |
| L-miR-90  | 8  | ugagagcucguguagaaagcc   | chr12:11963194..11963255:+  |
| L-miR-91  | 8  | cuacugucacucucuguc      | chr19:15575194..15575248:-  |
| L-miR-92  | 7  | aaauagugucuagaauaucuug  | chr2:136092844..136092898:- |
| L-miR-93  | 6  | agcuccugacauugucaccuga  | chr2:97787824..97787878:+   |
| L-miR-94  | 6  | agcuccugacauugucaccuga  | chr2:96648852..96648906:-   |
| L-miR-95  | 6  | agcuccugacauugucaccuga  | chr2:98197775..98197829:-   |
| L-miR-96  | 6  | uccuuucagaugguucucuaga  | chr2:218905712..218905767:- |
| L-miR-97  | 5  | acucuuccaaugugcacuuaga  | chr1:168490312..168490372:+ |
| L-miR-98  | 5  | uaucagauauucuggauuacua  | chr15:49622626..49622685:+  |
| L-miR-99  | 5  | ugaaagaugacacguguugacu  | chr2:198159017..198159099:- |
| L-miR-100 | 4  | uuaauuaagcagaguagugacu  | chr1:162205411..162205475:- |
| L-miR-101 | 4  | uuaauuaagcagaguagugacu  | chr1:162205414..162205478:+ |
| L-miR-102 | 4  | aaucaucuauagaacacugaagu | chr2:85935693..85935749:-   |
| L-miR-103 | 3  | agcccagcccucuucugucucc  | chr1:200960858..200960911:- |
| L-miR-104 | 3  | aagauauucugacacuaauuc   | chr2:136092846..136092898:+ |
| L-miR-105 | 3  | uaaucacuagagcggggacuca  | chrX:129202337..129202396:- |
| L-miR-106 | 2  | uuuggggauucuaagaggaag   | chr17:42344332..42344389:+  |
| L-miR-107 | 1  | uauauuaaaaugccguuaa     | chr15:65553708..65553764:+  |
